# Supplementary material for: Calming egress of inflammatory monocytes and related septic shock by therapeutic CCR2 silencing using macrophage-derived extracellular vesicles
Source: Royal Society of Chemistry journal article supplement (doi:10.1039/d1nr06922e), 2022-01-01
Supplement: d1nr06922e3.pdf [file d1nr06922e3.pdf]

**Supplementary Materials**

**Figure. 4D**

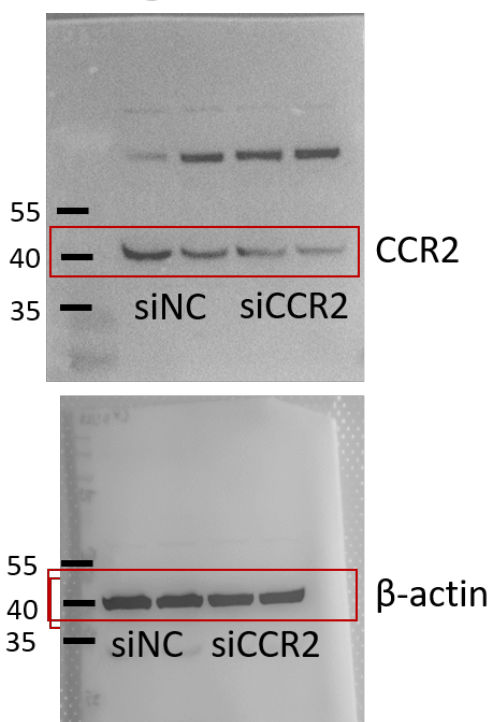

**Figure S1 Full images of immunoblots shown in the main figures.**
