# Supplementary figures and images for: Calming egress of inflammatory monocytes and related septic shock by therapeutic CCR2 silencing using macrophage-derived extracellular vesicles
Source: Royal Society of Chemistry journal article supplement (doi:10.1039/d1nr06922e), 2022-01-01

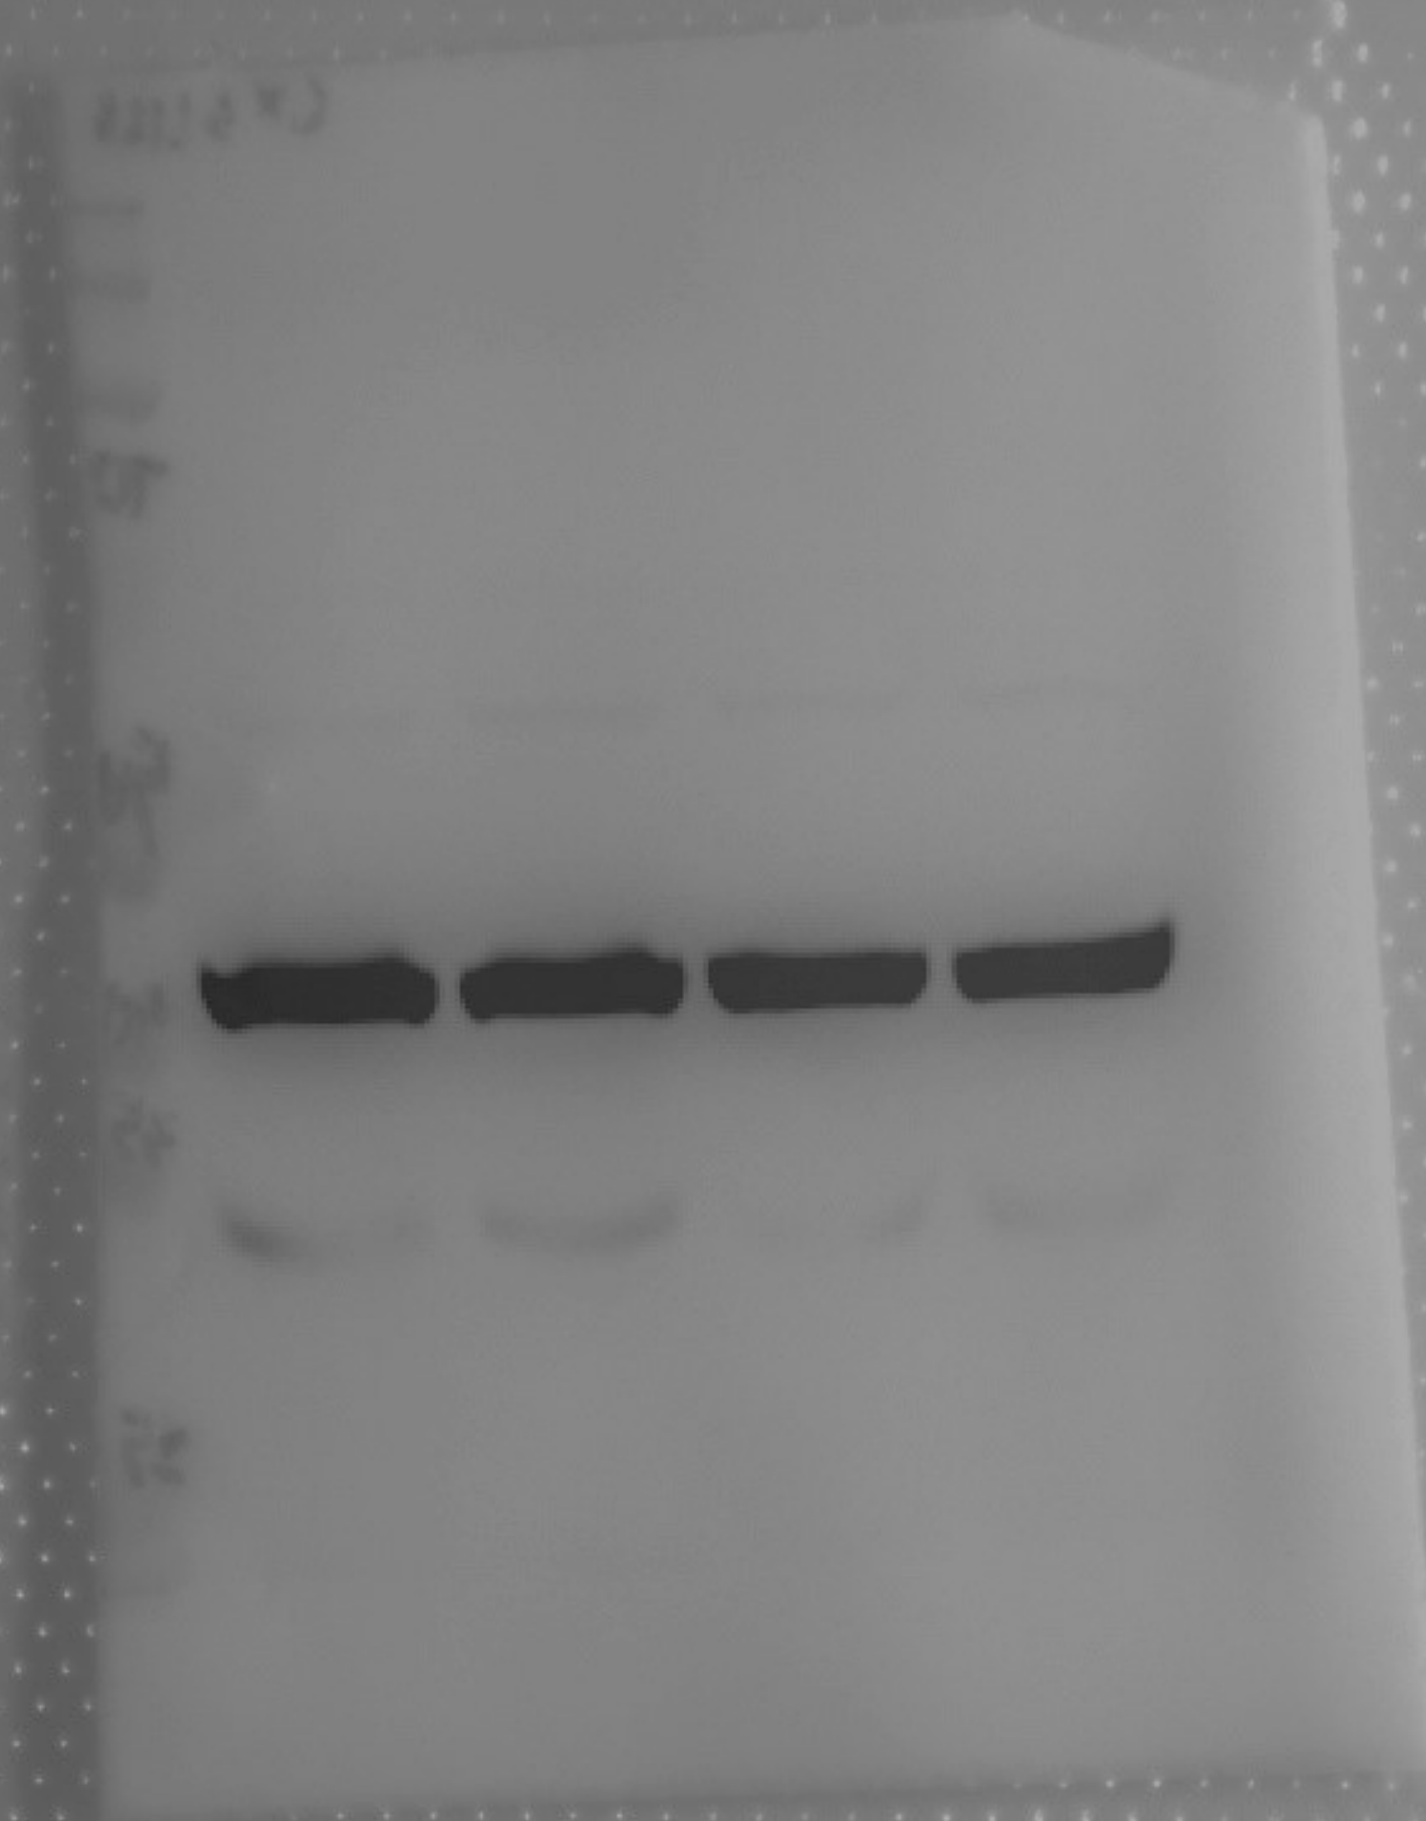

Supplement: d1nr06922e1.pdf [file d1nr06922e1.pdf]

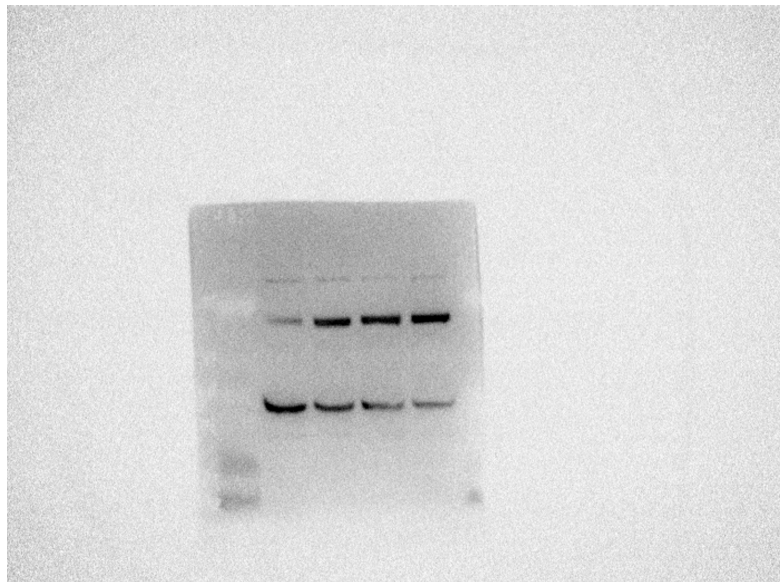

Supplement: d1nr06922e2.pdf [file d1nr06922e2.pdf]
